# Supplementary material for: Biflavones inhibit the fibrillation and cytotoxicity of the human islet amyloid polypeptide
Source: Royal Society of Chemistry journal article supplement (doi:10.1039/d2tb00230b), 2022-01-01
Supplement: d2tb00230b1.pdf [file d2tb00230b1.pdf]

*Supporting Information*

**Biflavones inhibit the fibrillation and cytotoxicity of human  
islet amyloid polypeptide**

Jufei Xu, Yanan Wang, Ting Zheng, Yan Huo, Weihong Du\*

Department of Chemistry, Renmin University of China, Beijing, 100872, China

**Table S1.** Height analysis of peptide aggregates along with lines marked in Fig. 3.

| Biflavones | Ratio | hIAPP    |                          |
|------------|-------|----------|--------------------------|
|            | B/p*  | Position | Height <sup>a</sup> / nm |
| <b>0</b>   | 0:1   | a        | 11.8                     |
| <b>1</b>   | 1:1   | b        | 30.8                     |
|            | 5:1   | c        | 20.9                     |
|            | 10:1  | d        | 7.7                      |
| <b>2</b>   | 1:1   | e        | 13.4                     |
|            | 5:1   | f        | 9.7                      |
|            | 10:1  | g        | 8.5                      |

<sup>a</sup> Values were determined by the AFM. \* B/p means the molar ratio of biflavones to peptides.

**Table S2.** Analysis of the favored and additional allowed regions in Ramachandran plot.

| Comps                | *Regions                            | No. of residues | Tag / % |
|----------------------|-------------------------------------|-----------------|---------|
| hIAPP22-28           | Most favored [A, B, L]              | 31              | 96.9    |
|                      | Additional allowed [a, b, l, p]     | 1               | 3.1     |
|                      | Generously allowed [~a, ~b, ~l, ~p] | 0               | 0.0     |
|                      | Disallowed [XX]                     | 0               | 0.0     |
| <b>1</b> +hIAPP22-28 | Most favoured [A, B, L]             | 28              | 87.5    |
|                      | Additional allowed [a, b, l, p]     | 4               | 12.5    |
|                      | Generously allowed [~a, ~b, ~l, ~p] | 0               | 0.0     |
|                      | Disallowed [XX]                     | 0               | 0.0     |
| <b>2</b> +hIAPP22-28 | Most favoured [A, B, L]             | 29              | 90.6    |
|                      | Additional allowed [a, b, l, p]     | 3               | 9.4     |
|                      | Generously allowed [~a, ~b, ~l, ~p] | 0               | 0.0     |
|                      | Disallowed [XX]                     | 0               | 0.0     |

\* The residues glycine and proline were excluded.

**Table S3.** Contact probability of hIAPP22–28 octamer with biflavones in MD simulation.

| Biflavones           | Chain-residues | Contact probability % | Biflavones           | Chain-residues | Contact probability % |
|----------------------|----------------|-----------------------|----------------------|----------------|-----------------------|
| <b>1</b> +hIAPP22–28 | a*-Ile26       | 47.87                 | <b>2</b> +hIAPP22–28 | c-Leu27        | 31.57                 |
|                      | g-Phe23        | 34.84                 |                      | g-Phe23        | 26.33                 |
|                      | b-Phe23        | 34.39                 |                      | g-Leu27        | 25.19                 |
|                      | e-Ile26        | 33.65                 |                      | d-Asn22        | 24.62                 |
|                      | d-Phe23        | 31.58                 |                      | c-Phe23        | 24.09                 |
|                      | a-Leu27        | 23.75                 |                      | a-Leu27        | 23.90                 |
|                      | c-Asn22        | 20.43                 |                      | h-Phe23        | 22.95                 |
|                      | g-Ile26        | 18.29                 |                      | h-Leu27        | 20.05                 |

\* The letters from a to h refer to each of the octamer chains.

**Table S4.** Contact distance of Phe23 residues in hIAPP22–28 octamers with biflavones in MD simulation.

| Biflavones   | Contact residues:1 | Avg distance(Å) | Biflavones   | Contact residues:2 | Avg distance(Å) |
|--------------|--------------------|-----------------|--------------|--------------------|-----------------|
| 1+hIAPP22–28 | g*-Phe23-CA:1-O4   | 3.82            | 2+hIAPP22–28 | g-Phe23-CA:2-H14   | 3.60            |
|              | g-Phe23-CA:1-H12   | 3.87            |              | g-Phe23-CA:2-H20   | 3.98            |
|              | g-Phe23-CA:1-O3    | 4.05            |              | g-Phe23-CA:2-C21   | 4.28            |
|              | g-Phe23-CA:1-H10   | 4.08            |              | g-Phe23-CA:2-O7    | 4.57            |
|              | g-Phe23-CA:1-H4    | 4.65            |              | g-Phe23-CA:2-C20   | 4.77            |
|              | g-Phe23-CA:1-C8    | 4.71            |              | g-Phe23-CA:2-C17   | 4.89            |
|              | g-Phe23-CA:1-C15   | 4.97            |              | g-Phe23-CA:2-O10   | 4.95            |

\* The letters from a to h refer to each of the octamer chains.

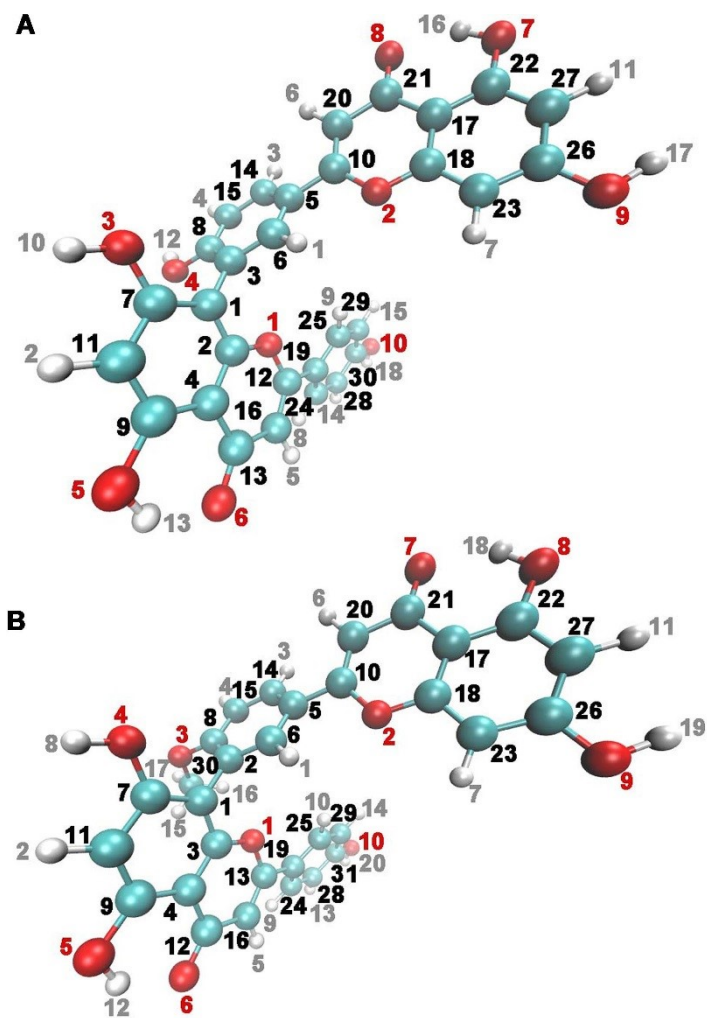

**Scheme S1.** The atoms nomenclature of 1 (A), and 2 (B) marked in MD simulation.

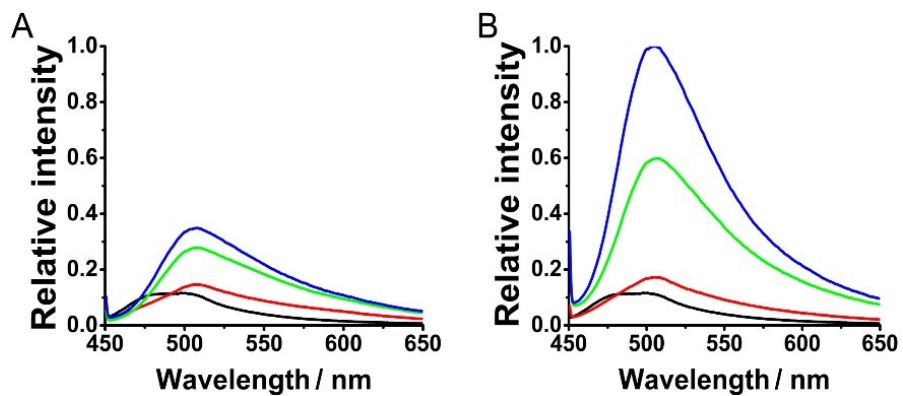

**Fig. S1.** The fluorescence spectra of 10  $\mu\text{M}$  ThT in the absence (black) or presence of 5 (red), 25 (green), and 50  $\mu\text{M}$  (blue) of **1** (A) and **2** (B) in 10 mM PB, pH 7.4.

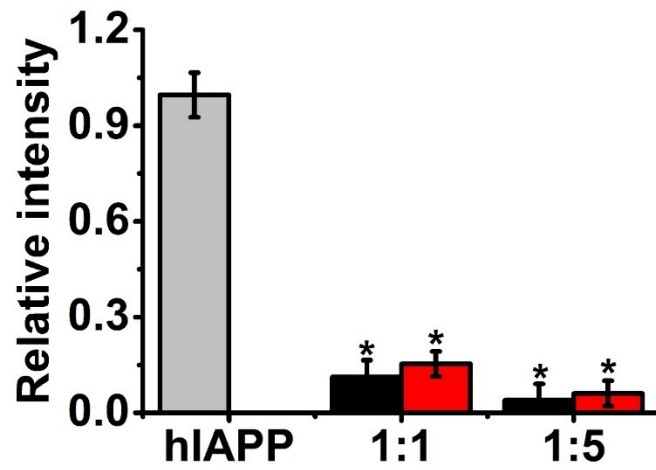

**Fig. S2.** ThT fluorescence assay of 5  $\mu$ M hIAPP (A, B) disaggregation in the absence (grey) or presence of equivalent and fivefold of **1** (black), and **2** (red) in 10 mM PB, pH 7.4. The concentration of ThT was 10  $\mu$ M in solution. The peak intensity was recorded at 484 nm.



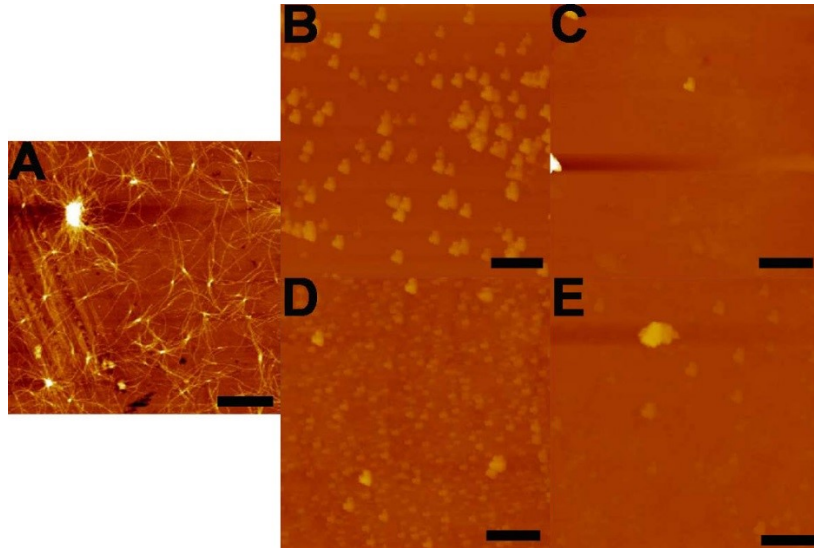

**Fig. S3.** AFM images of 5  $\mu\text{M}$  hIAPP disaggregation in the absence (A) or presence of equivalent (B, D), and fivefold amounts (C, E) of **1** (B, C), and **2** (D, E). The scale bar is 2  $\mu\text{m}$ .

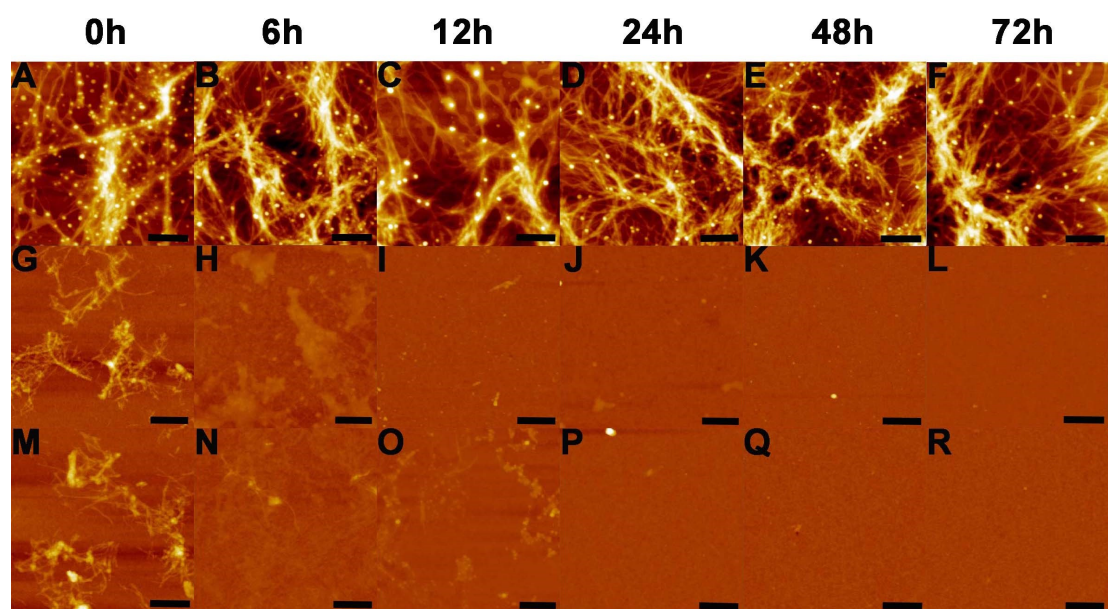

**Fig. S4.** AFM images of time-dependent disaggregation of 5  $\mu$ M hIAPP in the absence (A-F) or presence of fivefold excess of **1** (G-L), and **2** (M-R) (25  $\mu$ M) at 0, 6, 12, 24, 48, and 72 h.

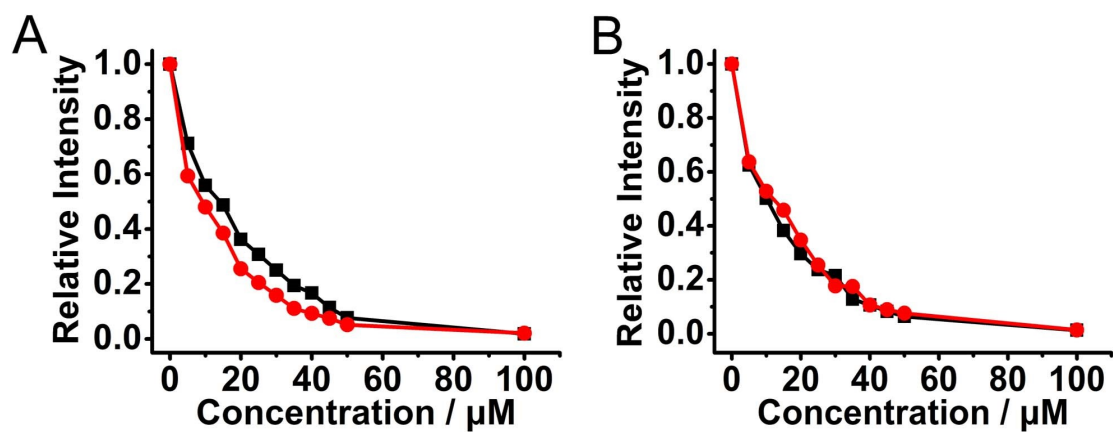

**Fig. S5.** Intrinsic fluorescence quenching of 10 μM hIAPP in the presence of **1** (black) and **2** (red) (0–100 μM) in 10 (A) and 100 mM PB (B) determined at pH 7.4 and 25°C.

The excitation and emission wavelengths were 275 nm and 305 nm, respectively.

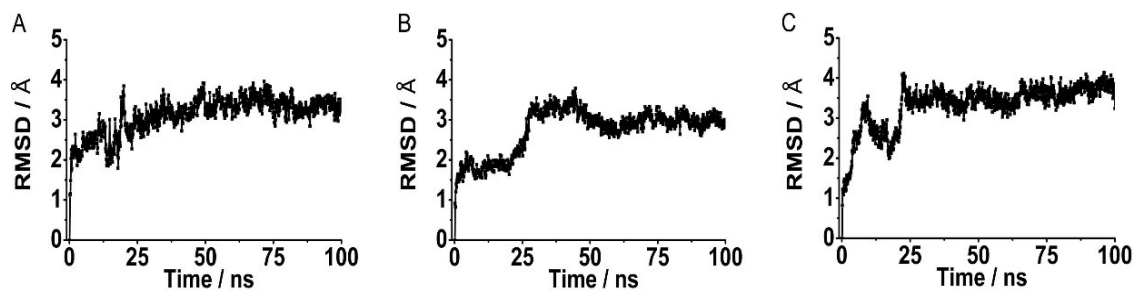

**Fig. S6.** RMSD of hIAPP22–28 octamer in the absence (A) or presence of fivefold excess of **1** (B) and **2** (C).

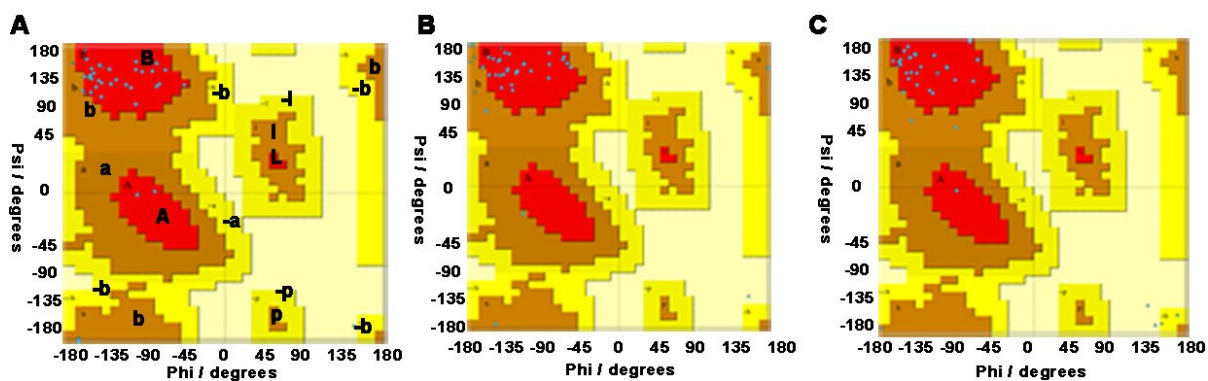

Fig. S7. Ramachandran plot maps of hIAPP22–28 octamer in the absence (A) or presence of fivefold excess of 1 (B) and 2 (C). The blue tag represents each amino acid. A-core alpha, B-core beta, L- core left-handed alpha; a-allowed alpha, b-allowed beta, l-allowed left-handed alpha, p-allowed epsilon; ~a-generous alpha, ~b-generous beta, ~l-generous left-handed alpha, ~p-generous epsilon. All the regions correspond to each other.

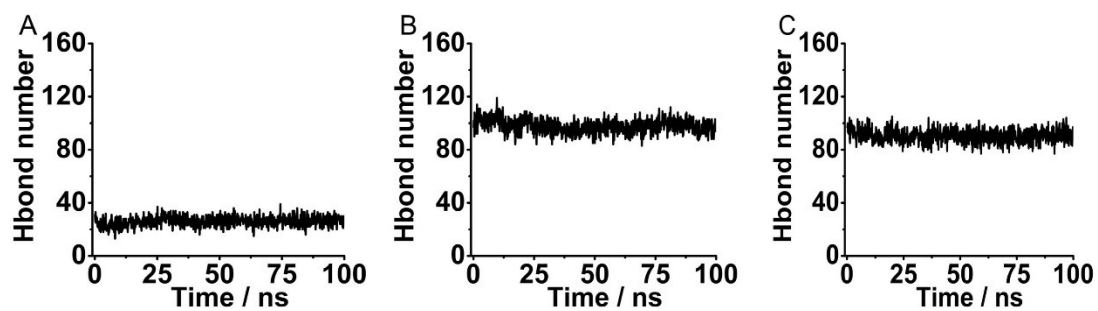

**Fig. S8.** Hydrogen bond number of hIAPP22–28 octamer in the absence (A) or presence of fivefold excess of **1** (B), and **2** (C) in 100 ns MD run.

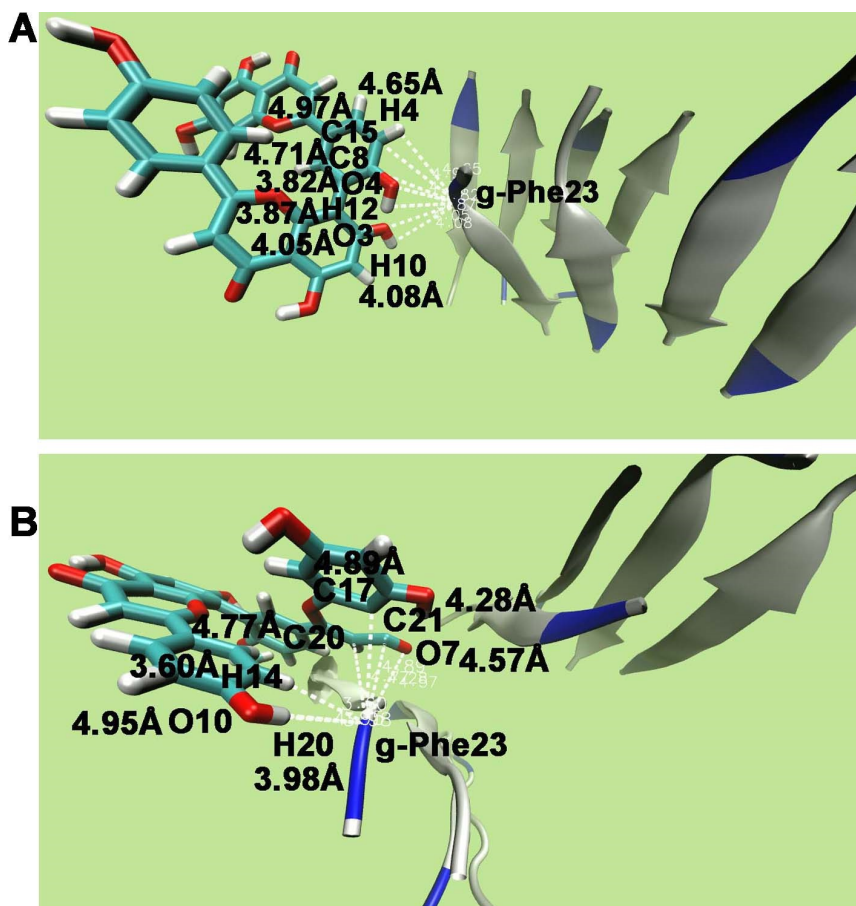

**Fig. S9.** Contact distribution of Phe23 residues in hIAPP22–28 octamer (gray) in the presence of fivefold excess of **1** (A) and **2** (B). The Phe23 (blue) residues were labelled in all the peptide chains. The white dotted lines represent the contact distance between the Phe23 residue and the atoms of biflavones.

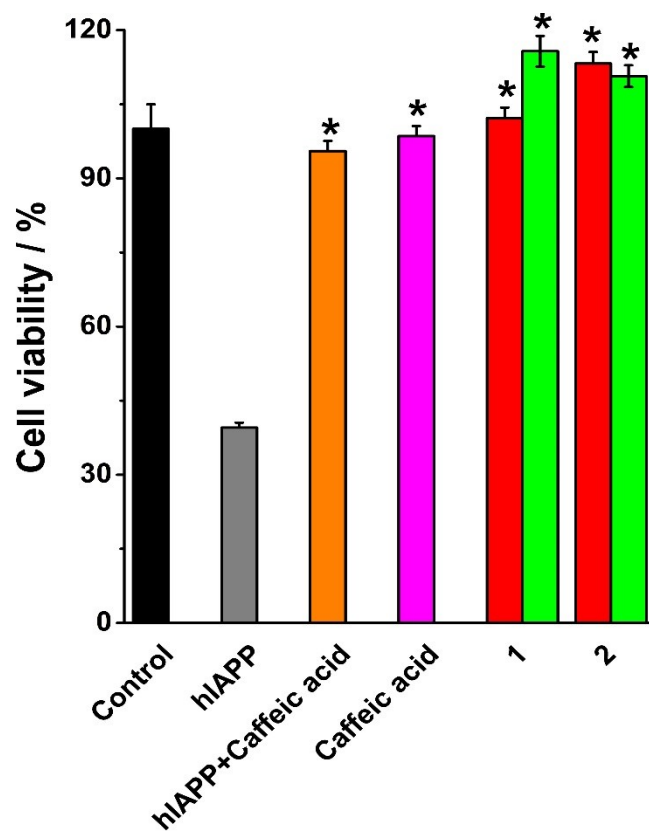

**Fig. S10.** The viability of INS-1 cells with 15  $\mu$ M hIAPP in the absence (grey) and presence of **1** and **2** alone at 1.5 (red), and 15.0  $\mu$ M (green), respectively. The negative control was obtained by incubating 15  $\mu$ M caffeic acid with hIAPP (orange). Data analysis presents means  $\pm$  S. E. M. with  $n = 3$ .  $*p < 0.05$  by one-way ANOVA in IBM SPSS Statistics 17.0. The marked is of significant difference compared with hIAPP alone (grey).



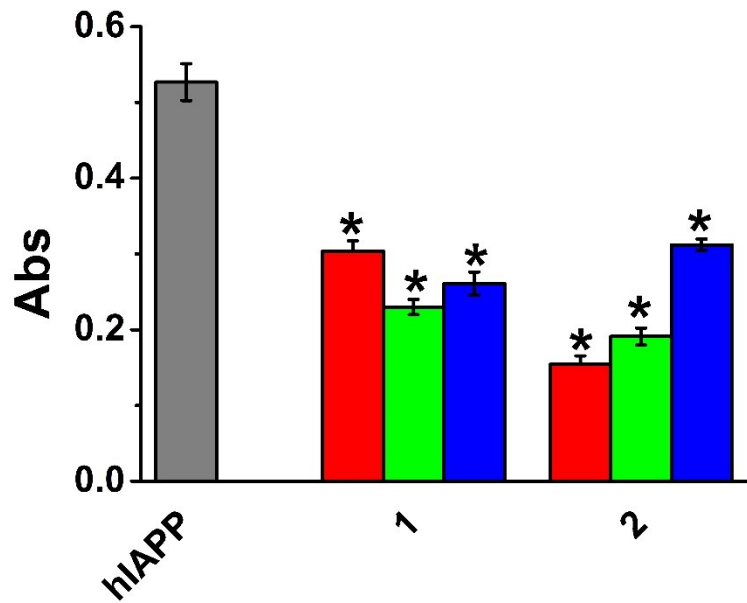

**Fig. S11.** ELISA assay of A-11 antibodies with 100  $\mu$ M hiIAPP in the absence (gray) and presence of 50 (red), 100 (green), and 200  $\mu$ M (blue) of **1** and **2** alone, respectively. Data are shown as means  $\pm$  SD, n=3 in normal distribution, \* $p < 0.05$  by one-way ANOVA in IBM SPSS Statistics 17.0. The marked is of significant difference compared with hiIAPP (grey).
